# Supplementary material for: Ultrafast excited state dynamics and spectroscopy of 13,13′-diphenyl-β-carotene
Source: Royal Society of Chemistry journal article supplement (doi:10.1039/c0cp02525a), 2011-01-01
Supplement: c0cp02525a.pdf [file c0cp02525a.pdf]

## **Electronic Supplementary Information**

# Ultrafast Excited State Dynamics and Spectroscopy of 13,13'-Diphenyl- $\beta$ -carotene

*Kai Golibrzuch, Florian Ehlers, Mirko Scholz, Rainer Oswald, Thomas Lenzer,*

*Kawon Oum,\* Hyungjun Kim and Sangho Koo\**

## Synthesis

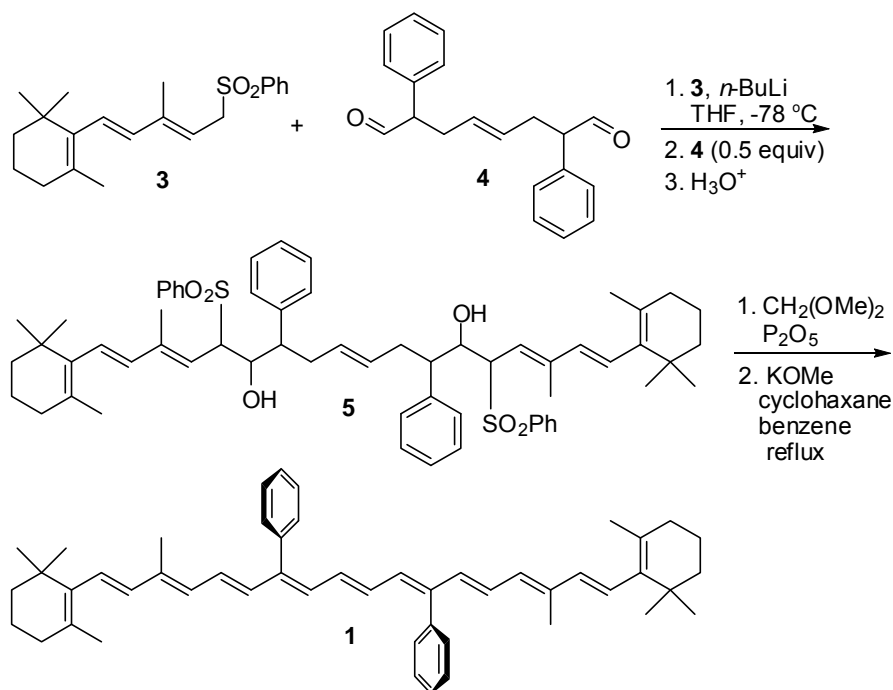

**Scheme S1.** Coupling of C<sub>15</sub> sulfone **3** and dialdehyde **4**, and the double-elimination protocol for the synthesis of 13,13'-β-carotene (**1**).

**(1E,3E,9E,15E,17E)-5,14-Bis(benzenesulfonyl)-3,16-dimethyl-7,12-diphenyl-1,18-bis(2,6,6-trimethylcyclohex-1-enyl)octadeca-1,3,9,15,17-pentaene-6,13-diol (5).** To a stirred solution of C<sub>15</sub> sulfone **3** (4.43 g, 12.86 mmol, 2.4 equiv) in THF (25 mL) at -78 °C was added 1.6 M hexane solution of *n*-BuLi (8.71 mL, 13.94 mmol, 2.6 equiv). The resulting red-orange solution was stirred for 30 min, and a solution of dialdehyde **4** (1.57 g, 5.36 mmol, 1 equiv) in THF (10 mL) was added for 5 min period. The mixture was stirred at -78 °C for 2 h, and 1 M HCl was added to quench the reaction. The reaction mixture was warmed up to room temperature, extracted with EtOAc (20 mL × 2), washed with 1 M HCl (15 mL × 2), dried over anhyd Na<sub>2</sub>SO<sub>4</sub>, filtered, and concentrated under reduced pressure. The crude product was purified by silica gel flash column chromatography to give the diol **5** (3.61 g, 3.67 mmol) in 69% yield.

Data for **5**:  $^1\text{H}$  NMR  $\delta$  0.99 (s, 12H), 1.44–1.50 (m, 4H), 1.55 (s, 6H), 1.58–1.66 (m, 4H), 1.66 (s, 6H), 2.02 (t,  $J = 6.0$  Hz, 4H), 2.07–2.22 (m, 2H), 2.30–2.44 (m, 2H), 2.58–2.80 (m, 2H), 3.83 (d,  $J = 2.8$  Hz, 2H), 4.00 (dd,  $J = 11.2, 8.0$  Hz, 2H), 4.25–4.36 (m, 2H), 4.91–5.05 (m, 4H), 5.84 (A of ABq,  $J = 16.0$  Hz, 2H), 5.96 (B of ABq,  $J = 16.0$  Hz, 2H), 7.04–7.09 (m, 4H), 7.12–7.23 (m, 6H), 7.40–7.47 (m, 4H), 7.56–7.62 (m, 2H), 7.68–7.74 (m, 4H) ppm; IR (KBr) 3503, 3030, 2935, 1717, 1648, 1653, 1624, 1448, 1305, 1148  $\text{cm}^{-1}$ ; HRMS (FAB $^+$ ) calcd for  $\text{C}_{56}\text{H}_{69}\text{O}_5\text{S}_2$  [ $\text{C}_{62}\text{H}_{77}\text{O}_6\text{S}_2 - (\text{C}_6\text{H}_6 + \text{H}_2\text{O})$ ] 885.4586, found 885.4571.

**All-(E)-13,13'-Diphenyl- $\beta$ -carotene (1).** To a stirred solution of the diol **5** (3.61 g, 3.67 mmol, 1 equiv) in dimethoxymethane (16.28 mL, 50 equiv) was added  $\text{P}_2\text{O}_5$  (1.57 g, 11.04 mmol, 3 equiv). The mixture was stirred at room temperature for 16 h, and extracted with  $\text{CH}_2\text{Cl}_2$  (40 mL). The reaction mixture was washed with saturated aqueous  $\text{NaHCO}_3$  solution (10 mL  $\times$  2), dried over anhyd.  $\text{Na}_2\text{SO}_4$ , filtered, and concentrated under reduced pressure. The crude product was purified by silica gel flash column chromatography (deactivated by 1%  $\text{Et}_3\text{N}$ ) to give the bis-MOM ether (2.99 g, 2.79 mmol) in 76% yield.

The above bis-MOM ether (2.99 g, 2.79 mmol, 1 equiv) was dissolved in cyclohexane (24 mL) and benzene (6 mL) under Ar atmosphere, and KOMe (1.96 g, 28.01 mmol, 10 equiv) was added. The resulting mixture was heated at 80–90  $^\circ\text{C}$  for 16 h, and then cooled to room temperature. Most of solvent was removed under reduced pressure, and the mixture was diluted with  $\text{CH}_2\text{Cl}_2$ . The mixture was washed with  $\text{H}_2\text{O}$ , dried over anhyd  $\text{Na}_2\text{SO}_4$ , filtered, and concentrated under reduced pressure. The crude product (1.64 g, 2.47 mmol, 88% yield) which was practically pure and contained less than 15% of stereoisomers, was recrystallized from THF and MeOH to give all-(E)-13,13'-diphenyl- $\beta$ -carotene (**1**) as a red solid.

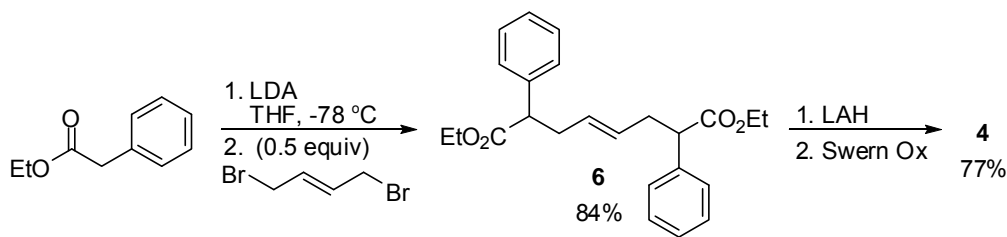

**Scheme S2.** Preparation of (*E*)-2,7-diphenyl-oct-4-enedial (**4**).

**Diethyl (*E*)-2,7-diphenyl-oct-4-enedioate (**6**):** To a stirred solution of diisopropylamine (70.0 mmol, 9.8 mL) in THF (70 mL) was added 1.6 M hexane solution of *n*-BuLi (70.0 mmol, 43.7 mL) at 0 °C. The mixture was stirred at 0 °C for 20 min, and cooled to –78 °C. A solution of ethyl phenylacetate (60.0 mmol, 9.6 mL) in THF (20 mL) was added to the above mixture. The resulting mixture was stirred at –78 °C for 40 min, and a solution of 1,4-dibromo-2-butene (20.0 mmol, 4.28 g) in THF (5 mL) was added. Stirring at –78 °C for 1 h, the mixture was warmed to room temperature, and quenched with 1 M HCl solution. The mixture was extracted with CH<sub>2</sub>Cl<sub>2</sub>, washed with 1 M HCl, dried over anhyd Na<sub>2</sub>SO<sub>4</sub>, filtered, and concentrated under reduced pressure. The crude product was purified by SiO<sub>2</sub> flash column chromatography (Hexanes:EtOAc = 9:1) to give diester **6** (16.74 mmol, 5.70 g, a 1:1 mixture of stereoisomers) in 84% yield. Data for **6**: R<sub>f</sub> = 0.51 (Hexanes:EtOAc = 4:1); <sup>1</sup>H NMR δ 1.86 (t, *J* = 7.1 Hz, 6H), 2.33–2.45 (m, 2H), 2.65–2.78 (m, 2H), 3.49 (ddd, *J* = 8.7, 6.7, 3.8 Hz, 2H), 4.00–4.18 (m, 4H), 5.31–5.46 (m, 2H), 7.20–7.34 (m, 10H) ppm; <sup>13</sup>C NMR δ 14.1, 36.4(36.5),\* 51.8(51.9),\* 60.7, 127.9, 128.5, 129.4, 138.6, 173.4 ppm; IR (KBr) 2923, 1738, 1452, 1366, 1059, 700 cm<sup>-1</sup>; HRMS (CI<sup>+</sup>) calcd for C<sub>24</sub>H<sub>29</sub>O<sub>4</sub> 381.2066, found 381.2066.

\*: <sup>13</sup>C NMR peaks in parenthesis are from the diastereoisomer.

**(*E*)-2,7-Diphenyl-oct-4-enedial (**4**).** To a stirred suspension of LiAlH<sub>4</sub> (14.68 mmol, 0.56 g) in THF (50 mL) at 0 °C was added a solution of diester **6** (7.34 mmol, 2.50 g) in THF (5 mL). Stirring for 30 min, the mixture was warmed to room temperature, and quenched with 1 M NaOH solution. The mixture was extracted with EtOAc, washed with 1 M HCl, dried over

anhyd Na<sub>2</sub>SO<sub>4</sub>, filtered, and concentrated under reduced pressure. The crude product was purified by SiO<sub>2</sub> flash column chromatography (Hexanes:EtOAc = 13:7) to give the corresponding diol (6.24 mmol, 1.85 g, a 1:1 mixture of stereoisomers) in 85% yield.

To a stirred solution of DMSO (9.84 mmol, 0.77 g) in CH<sub>2</sub>Cl<sub>2</sub> (70 mL) was added oxalyl chloride (8.43 mmol, 0.74 mL) at -78 °C. The mixture was stirred for 15 min, and a solution of the above diol (2.81 mmol, 1.00 g) in CH<sub>2</sub>Cl<sub>2</sub> (5 mL) was added. The resulting mixture was stirred at -78 °C for 40 min, and Et<sub>3</sub>N (28.10 mmol, 3.91 mL) was added. Stirring at -78 °C for 20 min, the mixture was warmed to room temperature, and quenched with 1 M HCl solution. The mixture was extracted with CH<sub>2</sub>Cl<sub>2</sub>, washed with 1 M HCl, dried over anhyd Na<sub>2</sub>SO<sub>4</sub>, filtered, and concentrated under reduced pressure. The crude product was purified by SiO<sub>2</sub> flash column chromatography (Hexanes:EtOAc = 17:3) to give dial **4** (2.57 mmol, 0.75 g, a 1:1 mixture of stereoisomers) in 91% yield. Data for **4**: R<sub>f</sub> = 0.66 (Hexanes:EtOAc = 3:2); <sup>1</sup>H NMR δ 2.32–2.43 (m, 2H), 2.68–2.78 (m, 2H), 2.47 (ddd, *J* = 8.3, 7.9, 6.8 Hz, 2H), 5.26–5.43 (m, 2H), 7.06–7.13 (m, 4H), 7.26–7.40 (m, 6H), 9.62 (d, *J* = 1.8 Hz, 2H) ppm; <sup>13</sup>C NMR δ 32.8, 58.9(59.0),\* 127.6, 128.8(128.9),\* 129.0, 129.2, 135.6, 200.3 ppm; IR (KBr) 3030, 2915, 2820, 2718, 1722, 1601, 1494, 700 cm<sup>-1</sup>; HRMS (CI<sup>+</sup>) calcd for C<sub>20</sub>H<sub>21</sub>O<sub>2</sub> 293.1541, found 293.1539.

\*: <sup>13</sup>C NMR peaks in parenthesis are from the diastereoisomer.

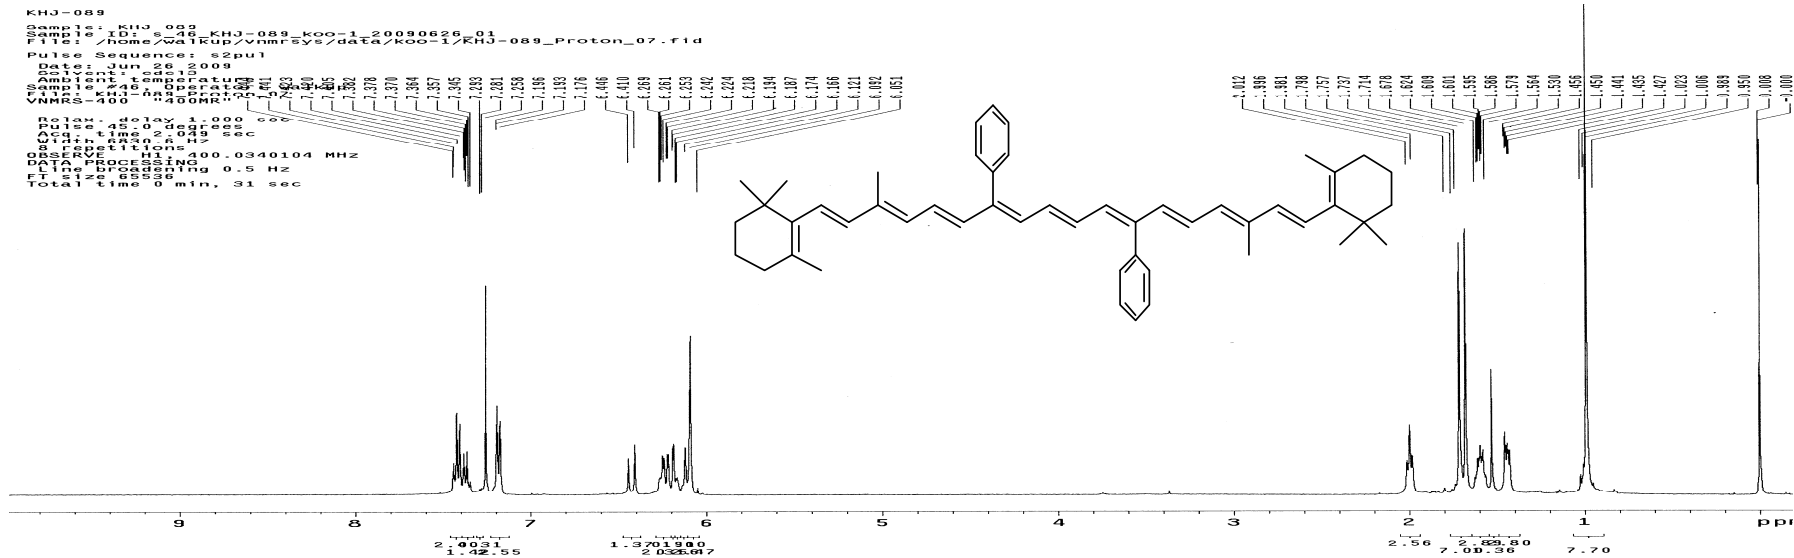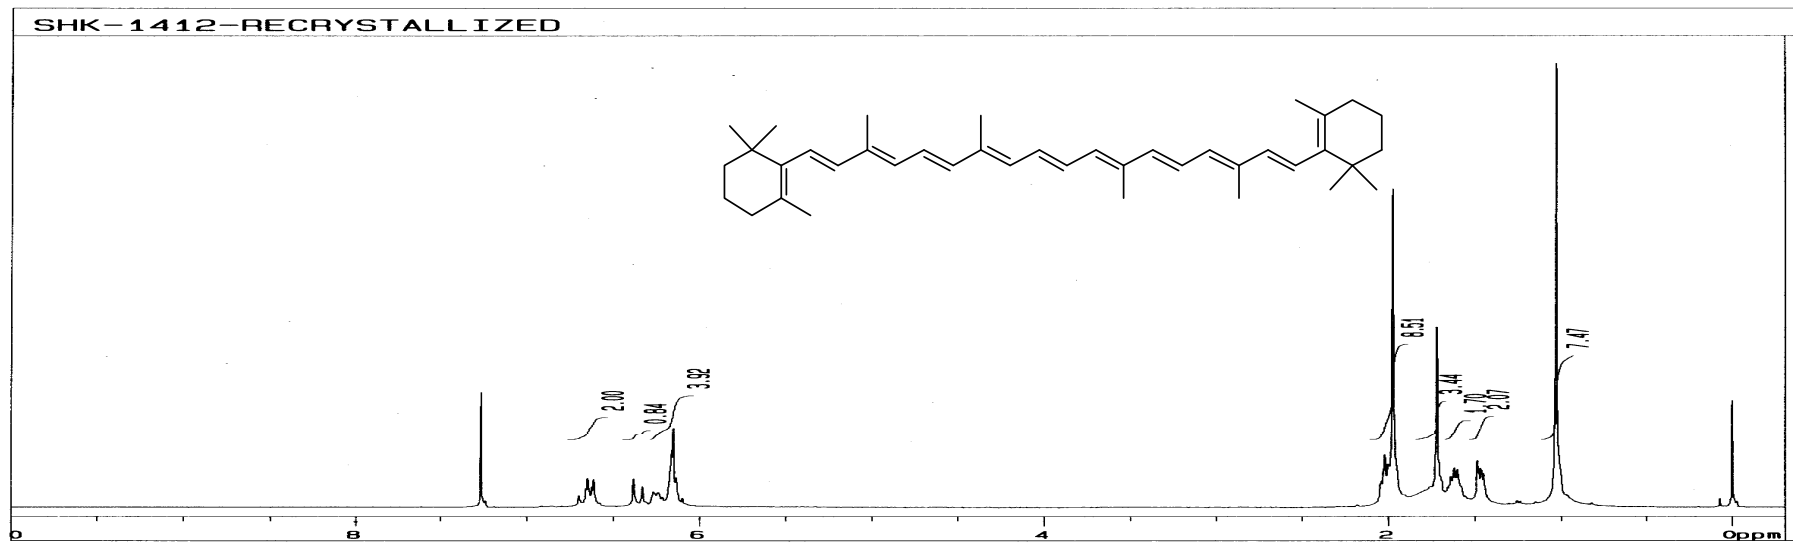

Figure S1. <sup>1</sup>H NMR Spectra of 13,13'-diphenyl-β-carotene (1) and β-carotene (2).

**Table S1. Evidence of the close to orthogonal displacement of phenyl groups to the conjugated polyenes chains in 13,13'-diphenyl- $\beta$ -carotene**

(1) - The  $^1\text{H}$  NMR chemical shifts of  $\text{H}^{11}$ ,  $\text{H}^{15}$ ,  $\text{C}^9\text{H}_3$  are to be up-field shifted compared to those of  $\beta$ -carotene due to the **ring current effect** of benzene.

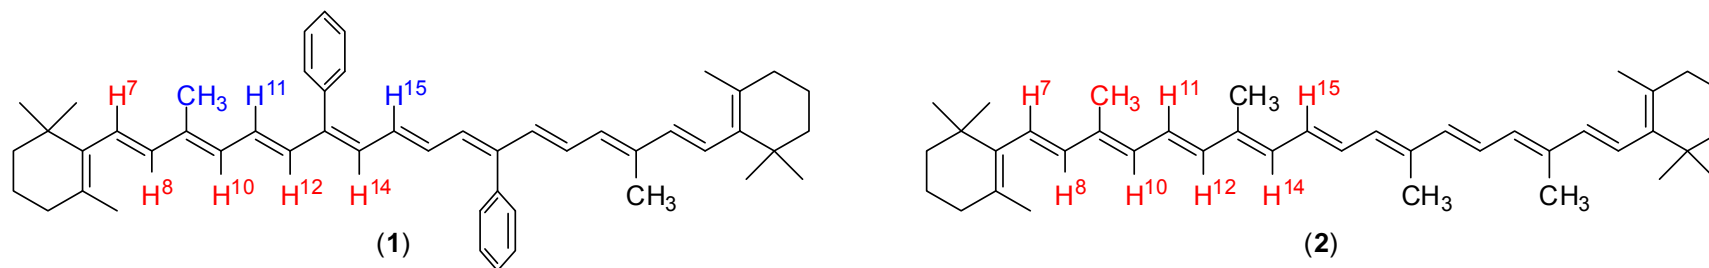

| $^1\text{H}$ NMR (ppm)                                 | H(7)  | H(8)  | $\text{C}(9)\text{H}_3$ | H(10) | H(11) | H(12) | H(14) | H(15) |
|--------------------------------------------------------|-------|-------|-------------------------|-------|-------|-------|-------|-------|
| <b>13,13'-diphenyl-<math>\beta</math>-carotene (1)</b> | 6.08  | 6.09  | 1.68                    | 6.11  | 6.22  | 6.43  | 6.25  | 6.18  |
| <b><math>\beta</math>-carotene (2)</b>                 | 6.15  | 6.18  | 1.98                    | 6.16  | 6.66  | 6.37  | 6.26  | 6.64  |
| <b>Difference (<math>\Delta</math>)</b>                | -0.07 | -0.09 | -0.30                   | -0.05 | -0.44 | +0.06 | -0.01 | -0.46 |

**Table S2.** Steady-state absorption spectra of 13,13'-diphenyl- $\beta$ -carotene (**1**) and  $\beta$ -carotene (**2**) in organic solvents.

| solvent                  | $R(n)^a$ | $\lambda_{\max}^b$ |          |                                     | $\epsilon_{\max}^b$ |          |
|--------------------------|----------|--------------------|----------|-------------------------------------|---------------------|----------|
|                          |          | <b>1</b>           | <b>2</b> | $\Delta\nu_{\max} (\text{cm}^{-1})$ | <b>1</b>            | <b>2</b> |
| acetone                  | 0.22     | 462.3              | 453.9    | 416                                 | -                   | -        |
| <i>n</i> -hexane         | 0.23     | 458.4              | 450.0    | 406                                 | -                   | -        |
| THF                      | 0.25     | 467.1              | 458.1    | 421                                 | 1.12                | -        |
| <i>i</i> -octane         | 0.24     | 458.7              | -        | -                                   | -                   | -        |
| toluene                  | 0.29     | 471.2              | 463.0    | 374                                 | -                   | -        |
| acetonitrile             | 0.21     | 462.3              | 453.3    | 430                                 | -                   | -        |
| $\text{CH}_2\text{Cl}_2$ | 0.26     | 471.0              | 462.5    | 390                                 | 1.32                | 1.72     |

<sup>a</sup>) Solvent polarizability function:  $(n^2-1)/(n^2+2)$ . <sup>b</sup>) Steady-state absorption maximum ( $\lambda_{\max}$ ) and absorption coefficient ( $\epsilon_{\max}$ ) for the  $S_0 \rightarrow S_2$  (0-1) transition in units nm and  $10^5 \text{ L}\cdot\text{mol}^{-1}\cdot\text{cm}^{-1}$ , respectively.

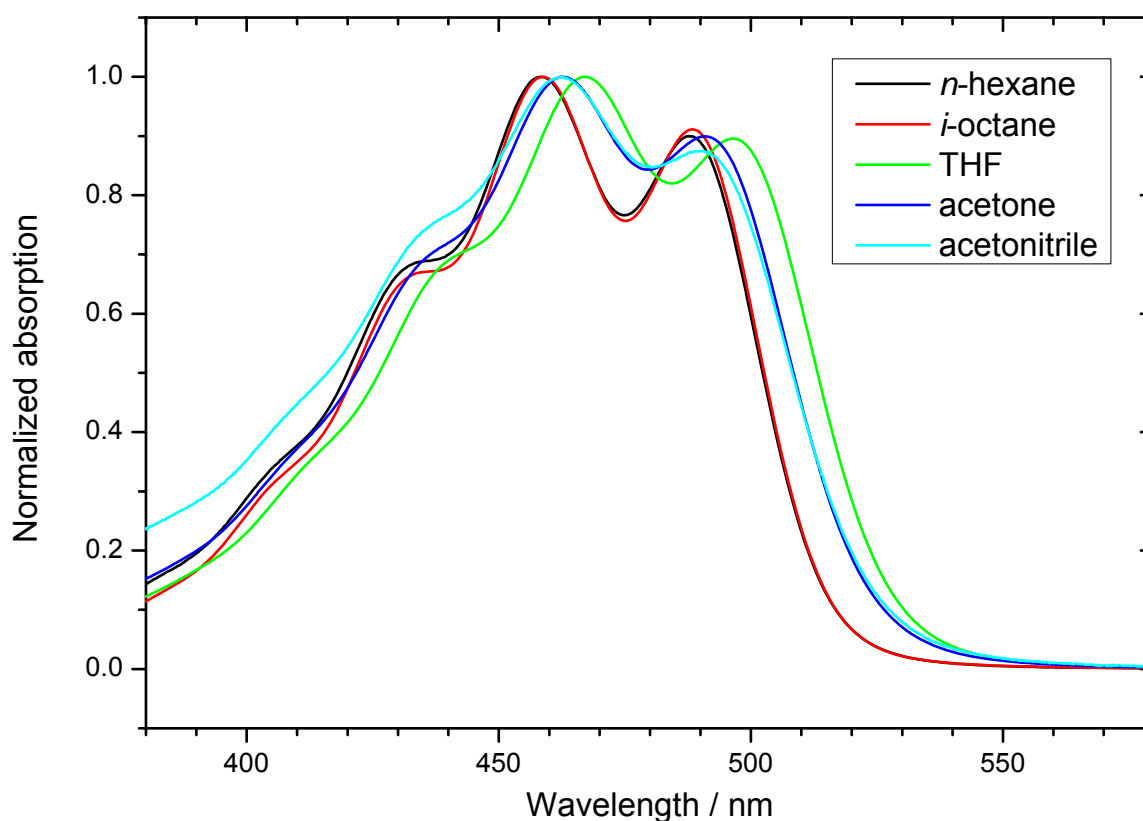

**Figure S2.** Comparison of steady-state absorption spectra of 13,13'-diphenyl- $\beta$ -carotene in various organic solvents at room temperature. Each spectrum is normalized to its absorption maximum. Information on absorption maxima and relevant solvent properties are summarized in Table S2.



## Additional DFT/TDDFT-TDA calculations

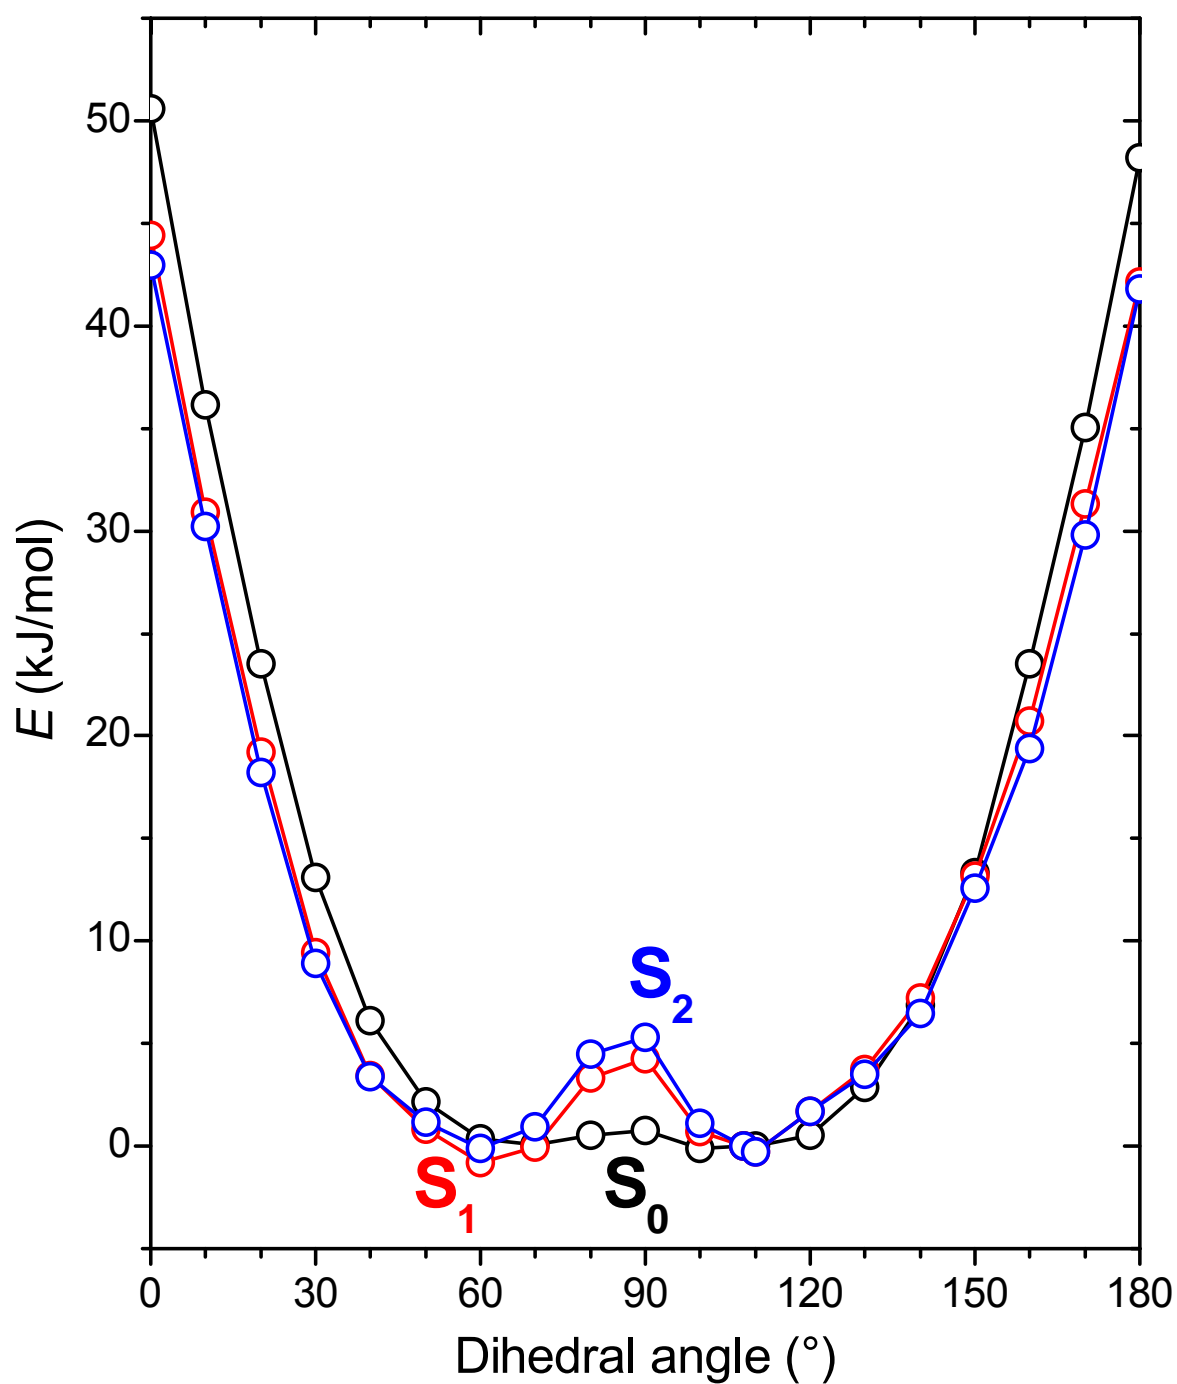

**Figure S3.** Energy profile for phenyl rotation in S<sub>0</sub> (black), S<sub>1</sub> (red) and S<sub>2</sub> (blue) of 13,13'-diphenyl- $\beta$ -carotene. One phenyl group was rotated in 10° steps. Functionals: B3LYP (S<sub>0</sub>), BLYP (S<sub>1</sub>, S<sub>2</sub>). Note the large barriers at 0 and 180° and the additional small barrier at ca. 90°, which becomes more pronounced in the excited states.

**Table S3.** Gas-phase transition energies  $E$ , transition wavelengths  $\lambda$  and oscillator strengths  $f$  from TDDFT-TDA calculations (BLYP 6-31+G\*) for the first five excited singlet states of 13,13'-diphenyl- $\beta$ -carotene and  $\beta$ -carotene.

| state          | 13,13'-diphenyl- $\beta$ -carotene |                |     | $\beta$ -carotene |                |     |
|----------------|------------------------------------|----------------|-----|-------------------|----------------|-----|
|                | $E$ (eV)                           | $\lambda$ (nm) | $f$ | $E$ (eV)          | $\lambda$ (nm) | $f$ |
| S <sub>1</sub> | 1.98                               | 628            | 0.0 | 2.00              | 618            | 0.0 |
| S <sub>2</sub> | 2.09                               | 592            | 4.5 | 2.11              | 587            | 4.3 |
| S <sub>3</sub> | 2.57                               | 482            | 1.3 | 2.63              | 472            | 1.5 |
| S <sub>4</sub> | 2.74                               | 453            | 0.0 | 2.77              | 448            | 0.0 |
| S <sub>5</sub> | 2.81                               | 441            | 0.5 | 2.90              | 427            | 0.8 |

**Table S4.** Same as in **Table S3**, but for the SVWN functional.

| state          | 13,13'-diphenyl- $\beta$ -carotene |                |     | $\beta$ -carotene |                |     |
|----------------|------------------------------------|----------------|-----|-------------------|----------------|-----|
|                | $E$ (eV)                           | $\lambda$ (nm) | $f$ | $E$ (eV)          | $\lambda$ (nm) | $f$ |
| S <sub>1</sub> | 1.96                               | 634            | 0.0 | 1.99              | 624            | 0.0 |
| S <sub>2</sub> | 2.07                               | 598            | 4.3 | 2.09              | 592            | 4.1 |
| S <sub>3</sub> | 2.56                               | 485            | 1.7 | 2.61              | 476            | 1.8 |
| S <sub>4</sub> | 2.69                               | 462            | 0.0 | 2.72              | 456            | 0.0 |
| S <sub>5</sub> | 2.80                               | 443            | 0.5 | 2.89              | 429            | 0.8 |
